# 1 Serum levels and tumour expression of leptin and 2 leptin receptor as promising clinical biomarkers of 3 specific feline mammary carcinoma subtypes

4 **Andreia Gameiro<sup>1</sup>, Catarina Nascimento<sup>1</sup>, Ana Catarina Urbano<sup>1</sup>, Jorge Correia<sup>1</sup>, Fernando  
5 Ferreira<sup>1\*</sup>**

6 <sup>1</sup>CIISA - Centro de Investigação Interdisciplinar em Sanidade Animal, Faculdade de Medicina Veterinária,  
7 Universidade de Lisboa, Avenida da Universidade Técnica, 1300-477 Lisboa, Portugal;

8 \* Correspondence: [fernandof@fmv.ulisboa.pt](mailto:fernandof@fmv.ulisboa.pt) (F.F.); Tel.: (+351) 21 365 2800 / Ext.: 431234 (F.F.)

9 **Abstract:** Obesity is a risk factor for human breast cancer, being associated with increased serum  
10 levels of leptin. In cat, although obesity is a common nutritional disorder, the role of leptin and its  
11 receptor in mammary carcinoma is unknown. In this study, serum levels of leptin and leptin  
12 receptor (ObR) were evaluated in 58 cats with mammary carcinoma and compared with healthy  
13 controls by ELISA, as tumour expression by immunohistochemistry. Results showed that the free  
14 leptin index is decreased in cats with mammary carcinoma ( $p=0.0006$ ), particularly for those with  
15 luminal B and HER2-positive disease that showed significantly lower serum leptin levels ( $p<0.0001$   
16 and  $p<0.005$ , respectively). Serum leptin levels above 4.17 pg/mL were associated with ulcerating  
17 tumours ( $p=0.0005$ ) and shorter DFS ( $p=0.0217$ ). Elevated serum ObR levels were found in all cats  
18 with mammary carcinoma ( $p<0.0001$ ), with levels above 16.89 ng/mL being associated with smaller  
19 tumours ( $p=0.0118$ ), ER-negative status in HER2-positive tumours ( $p=0.0291$ ) and increased serum  
20 levels of CTLA-4 ( $p=0.0056$ ), TNF- $\alpha$  ( $p=0.0025$ ), PD-1 ( $p=0.0023$ ) and PD-L1 ( $p=0.0002$ ). In tumour  
21 samples, leptin was overexpressed in luminal B and triple-negative carcinomas ( $p=0.0046$ ), whereas  
22 ObR was found overexpressed in luminal B samples ( $p=0.0425$ ). Altogether, our results reinforce the  
23 importance of feline mammary carcinoma in comparative oncology.

24 **Keywords:** feline mammary carcinoma, free leptin index, leptin, leptin receptor,  
25 immunosuppression, biomarkers  
26

---

## 27 1. Introduction

28 The feline mammary carcinoma (FMC) is a high prevalence disease (12 to 40% of all tumours in  
29 cat) that shows similar clinicopathological features to human breast cancer [1], supporting its use in  
30 comparative oncology studies [2] [3]. Likewise, obesity is a common nutritional disorder in cat, with  
31 higher prevalence in indoor and sterilized animals above three years of age [4]. In humans, obesity  
32 induces a chronic inflammatory status, being a risk factor for breast cancer [5] [6] [7].

33 Leptin is a 16 kDa adipocytokine, encoded by the *obese* gene and involved in the central  
34 regulation of food intake, energy homeostasis, modulation of reproductive function and peripheral  
35 metabolic processes, such as breast/mammary gland development, cellular proliferation and  
36 angiogenesis. In tissues and serum, leptin expression is modulated by fat mass, with healthy cats  
37 showing lower serum leptin levels than obese animals [4], as reported in humans [5] [6]. Interestingly,  
38 although this protein is mainly secreted by adipocytes, it can be also expressed by pathologically  
39 altered cells, such as cancer cells [8] [9]. Thus, malignant cells can regulate their metabolic activities  
40 [10], promoting uncontrolled cell growth, migration, invasion and angiogenesis [11] [7], and  
41 downregulating apoptosis through a Bcl-2-dependent mechanism [10] [12]. Accordingly, leptin  
42 overexpression is detected in breast cancer cells and neighbouring adipocytes, contrasting with  
43 normal breast glandular epithelial cells [13] [7], suggesting an oncogenic role for this adipocytokine  
44 [6]. Furthermore, studies in human breast cancer patients showed that leptin overexpression has  
45 paracrine effects, not always reflected in serum levels, although associated with more aggressive

46 tumours and therapy resistance [13]. Additionally, in overweight human patients a positive  
47 correlation was found between leptin overexpression in the tumour microenvironment and  
48 oestrogen receptor (ER) positive breast cancer, and with a human epidermal growth factor receptor  
49 2 (HER 2)-positive status frequently related to a more invasive tumour phenotype [14].

50 In parallel, the leptin receptor (ObR, 150-190 kDa) was found to be involved in innate and  
51 adaptive immunity [15], being expressed in several organs, including breast and peripheral tissues,  
52 as well as in adipocytes [16] [17] and immune cells. ObR is constituted by an extracellular N-terminus  
53 domain, a transmembrane domain, and a cytoplasmic C-terminus domain. Upon leptin ligation, ObR  
54 homodimerizes and the associated JAK monomer is auto phosphorylated to activate the downstream  
55 signalling pathways [8]. The soluble ObR form is a 146 kDa protein [18] that could be generated by  
56 cellular apoptosis or by the proteolytic cleavage of the extracellular anchored protein domain, with  
57 this shedding being more frequent in shorter intracellular isoforms. In serum, the ObR modulates the  
58 leptin bioavailability, being decreased in obese humans [8]. In breast cancer patients, ObR is  
59 overexpressed independently of the ER status [6], being correlated with low overall survival (OS) [9].  
60 Furthermore, the ratio between leptin/ObR serum levels (free leptin index – FLI) is considered an  
61 useful predictor of leptin activity, reflecting the individual metabolic status [19] and when increased,  
62 is an important risk factor for breast cancer development [20]. In parallel, studies in breast cancer  
63 patients found an association between leptin and ObR overexpression with a chronic inflammatory  
64 status, conditioning T-cell immune responses (increase Th1- and decrease Th2-responses) [21] and  
65 the activation of immune checkpoint inhibitors [16]. Indeed, some studies in humans have shown a  
66 positive correlation between overexpression of leptin and ObR with several immunomodulatory  
67 molecules (e.g. Cytotoxic T-Lymphocyte Associated Protein 4 - CTLA-4; Tumor Necrosis Factor  $\alpha$  -  
68 TNF- $\alpha$ ; Programmed Cell Death-1 - PD-1 and Programmed Cell Death-ligand 1 - PD-L1) [22] [23].  
69 While the CTLA-4 is a protein related to the inflammatory response that is increased in breast cancer  
70 patients, contributing for the immune response downregulation [24], the TNF- $\alpha$  is a pro-  
71 inflammatory cytokine that induces apoptosis promoted by the absence of leptin [25]. Moreover, the  
72 overexpression of PD-1 in T-cells is associated with ObR overexpression in humans with distinct  
73 tumour types [26], induced through the AKT pathway activation by oestrogens [27] and being  
74 responsible for the PD-1 mediated T-cell dysfunction [28].

75 As mentioned above, obesity is associated with increased leptin levels, which induces resistance  
76 to chemotherapy [29] [30]. Therefore, the leptin/ObR axis has been widely studied [31] as a target for  
77 a adjuvant therapy, not only in ER-positive tumour status [29], but also in triple-negative tumours  
78 [32], in which the lack of hormonal receptors reduces the therapeutic options. The use of leptin  
79 antagonists, allows the blocking of the leptin receptor, leading to a downregulation of the leptin  
80 downstream pathways, some of them known as oncogenic (e.g. Wnt and STAT3) [29] [32] [31].

81 To the best of our knowledge, this study is the first to evaluate the leptin and ObR serum levels  
82 and tissue expression in cats with mammary carcinoma. The main goals of this study were as follows:  
83 1) to compare the serum leptin and ObR levels between cats with mammary carcinoma stratified by  
84 molecular subtype and healthy controls, using ELISA; 2) to investigate the leptin and ObR expression  
85 in mammary carcinoma samples and compare with normal mammary tissues, using  
86 immunohistochemistry (IHC); 3) to search for associations between serum leptin/ObR levels and  
87 leptin/ObR IHC scores in tumour mammary tissues; 4) to test for associations between serum  
88 leptin/ObR levels and several clinicopathological features, in order to evaluate the utility of leptin  
89 and ObR as diagnostic and/or prognosis biomarkers or as promising drug targets for feline mammary  
90 carcinoma.

## 91 **2. Materials and Methods**

### 92 *2.1. Animal population*

93 Tumour tissue and serum samples were collected from 58 female cats with fully documented  
94 history of FMC that underwent mastectomy and 24 serum samples from healthy cats presented for  
95 elective ovariohysterectomy, at the Teaching Hospital of the Faculty of Veterinary Medicine,

96 University of Lisbon. The animals were anesthetized before surgical procedures and blood samples  
 97 were collected with no interference in animal well-being, with the procedures involving  
 98 manipulation of animals being consented by the owners. Briefly, all tissue samples were embedded  
 99 in paraffin after fixation in 10% buffered neutralized formalin (pH 7.2), during 24-48 hours, while  
 100 serum samples were separated from clotted blood by centrifugation (1500g, 10min, 4°C) and stored  
 101 at -80°C until further use. All samples that showed haemolysis were discarded, as recommended [1]  
 102 [33].

103 For each animal enrolled in the study, the clinicopathological data were recorded, including age,  
 104 breed, body weight, reproductive status and contraceptive administration, treatment (none,  
 105 mastectomy or mastectomy plus chemotherapy), number, location and size of tumoral lesions,  
 106 histopathological classification (ER status, PR status, HER2 status and Ki-67 index), malignancy  
 107 grade, presence of tumour necrosis, lymphatic invasion, lymphocytic infiltration, cutaneous  
 108 ulceration, regional lymph node involvement and clinical stage (TNM system) (Table 1). Regarding  
 109 the molecular subtyping of feline mammary carcinomas [34], animals were stratified in luminal A  
 110 (n=10), luminal B (n=17), HER2-positive (n=15) and triple-negative (n=16) groups.

111 **Table 1.** Clinicopathological features of female cats with mammary carcinomas enrolled in this  
 112 study (n=58).

| Clinicopathological feature | Number of animals (%) | Clinicopathological feature     | Number of animals (%) |
|-----------------------------|-----------------------|---------------------------------|-----------------------|
| <b>Breed</b>                |                       | <b>Size</b>                     |                       |
| Undifferentiated            | 44 (75.9%)            | <2cm                            | 22 (37.9%)            |
| Siamese                     | 7 (12.1%)             | ≥2cm                            | 36 (62.1%)            |
| Persian                     | 5 (8.6%)              | <b>Animal Weight</b>            | (23 unknown)          |
| Norwegian Forest            | 2 (3.4%)              | <3kg                            | 6 (10.3%)             |
| <b>Age</b>                  |                       | 3 – 5kg                         | 24 (41.4%)            |
| <8years old                 | 4 (6.9%)              | >5kg                            | 5 (8.6%)              |
| ≥8 years old                | 54 (93.1%)            | <b>Treatment</b>                | (3 unknown)           |
| <b>Reproductive status</b>  | (1 unknown)           | Mastectomy                      | 49 (84.5%)            |
| Spayed                      | 20 (34.5%)            | Mastectomy + Chemo              | 4 (6.9%)              |
| Pill                        | 21 (36.2%)            | None                            | 2 (3.4%)              |
| Both                        | 9 (15.5%)             | <b>Multiple tumours</b>         |                       |
| Any                         | 7 (12.1%)             | Yes                             | 35 (60.3%)            |
| <b>Lymph node status</b>    | (4 unknown)           | No                              | 23 (39.7%)            |
| Positive                    | 19 (32.8%)            | <b>Malignancy grade</b>         | (1 unknown)           |
| Negative                    | 35 (60.3%)            | I                               | 3 (5.2%)              |
| <b>Stage (TNM)</b>          |                       | II                              | 8 (13.8%)             |
| I                           | 15 (25.9%)            | III                             | 46 (79.3%)            |
| II                          | 6 (10.3%)             | <b>Necrosis</b>                 |                       |
| III                         | 31 (53.4%)            | Yes                             | 42 (72.4%)            |
| IV                          | 6 (10.3%)             | No                              | 16 (27.6%)            |
| <b>Lymphatic invasion</b>   |                       | <b>Lymphocytic infiltration</b> | (2 unknown)           |
| Yes                         | 7 (12.1%)             | Yes                             | 37 (63.8%)            |
| No                          | 51 (87.9%)            | No                              | 19 (32.8%)            |
| <b>HER2 status</b>          |                       | <b>Tumour ulceration</b>        |                       |
| Positive                    | 14 (24.1%)            | Yes                             | 8 (13.8%)             |
| Negative                    | 44 (75.9%)            | No                              | 50 (86.2%)            |
| <b>ER status</b>            |                       | <b>Ki67 index</b>               | (1 unknown)           |
| Positive                    | 31 (53.4%)            | Low (<14%)                      | 18 (31%)              |
| Negative                    | 27 (46.6%)            | High (≥14%)                     | 39 (67.2%)            |
| <b>PR status</b>            |                       |                                 |                       |

|          |            |
|----------|------------|
| Positive | 36 (62.1%) |
| Negative | 22 (37.9%) |

---

113 TNM – Tumor, Node, Metastasis; ER – Estrogen Receptor; PR – Progesterone Receptor.

## 114 2.2. Measurement of serum leptin, ObR, CTLA-4, TNF- $\alpha$ , PD-1 and PD-L1 levels

115 The serum levels of leptin, ObR, CTLA-4, TNF- $\alpha$ , PD-1 and PD-L1 were measured by using  
116 commercial ELISA-based kits from R&D Systems (Minneapolis, USA; DY389, DY398-05, DY476,  
117 DY2586, DY1086, DY156, respectively) and following the manufacture's recommendations. After  
118 collection, the serum samples were kept stored at -80°C and thawed shortly before use. For each  
119 assay, a standard curve was generated by using serial dilutions of the recombinant proteins from kits.  
120 For leptin, ObR, PD-1 and PD-L1 the  $r^2$  values were calculated using a quadratic regression ( $r^2=0.9976$ ,  
121 for leptin,  $r^2=0.9632$ , for ObR,  $r^2=0.99$  for PD-1 and  $r^2=0.96$  for PD-L1), whereas serum CTLA-4 and  
122 TNF- $\alpha$  concentrations were determined by using a curve-fitting equation ( $r^2>0.99$ ), as previously  
123 reported [35].

124 Briefly, a 96-well plate was prepared by adding the capture antibody to each well and incubate  
125 overnight. Plates were then treated with 1% bovine serum albumin (BSA) in phosphate buffered  
126 saline (PBS), for 1 hour, to prevent nonspecific binding. Standards and diluted serum samples were  
127 added to sample wells and incubated for 2 hours at room temperature (RT), before the incubation of  
128 the detection antibody for 2 hours at RT. Afterwards, the streptavidin-conjugated to horseradish  
129 peroxidase (HRP) was added to each well and incubated at RT, for 20 minutes, before the addition of  
130 the substrate solution in 1:1 H<sub>2</sub>O<sub>2</sub> and tetramethyl-benzidine to each well (20 minutes, at RT, in the  
131 dark). The reaction was interrupted by adding a stop solution (2NH<sub>2</sub>SO<sub>4</sub>) and the absorbance was  
132 measured by a spectrophotometer (FLUOStar OPTIMA, Microplate Reader, BMG, Ortenberg,  
133 Germany), using 450 nm as the primary wavelength and 570 nm as a reference wavelength.

## 134 2.3. Assessment of the leptin and ObR status by immunohistochemistry (IHC)

135 Initially, the feline mammary carcinoma formalin fixed paraffin-embedded (FFPE) samples were  
136 stained with haematoxylin-eosin to select a representative tumour area and a normal tissue area to  
137 be used as control (n=20). FFPE samples were sectioned in slices with 3  $\mu$ m thickness (Microtome  
138 Leica RM135, Newcastle, UK) and mounted on a glass slide (SuperFrost Plus, Thermo Fisher  
139 Scientific, Massachusetts, USA). On PT-Link module (DAKO, Agilent, Santa Clara, USA), samples  
140 were deparaffinized, hydrated and antigen retrieval was performed, for 20 minutes, at 96°C, using  
141 Tris-EDTA buffer, pH 9.0 (EnVision™ Flex Target Retrieval Solution High pH, Dako). Then, slides  
142 were cooled for 30 minutes at RT and immersed twice, for 5 minutes in distilled water. IHC technique  
143 was performed with commercial solutions from the Novolink™ Max Polymer Detection System Kit  
144 (Leica Biosystems, Newcastle UK). Before antibody incubation, tissue samples were treated to block  
145 the endogenous peroxidase activity for 15 minutes, and the unspecific antigenic recognition was  
146 inhibited for 10 minutes. Finally, tissue samples were incubated at RT for 1 hour, in a humidified  
147 chamber, with the following primary antibodies: anti-leptin antibody (ab3583, AbCAM, Cambridge,  
148 UK) and anti-ObR antibody (ab104403, AbCAM), both diluted at 1:200. The slides were washed twice,  
149 for 5 minutes, between all the incubation steps, using a PBS solution at pH 7.4. Then, the detection  
150 polymer was incubated for 30 minutes, at RT, and detection was performed using diaminobenzidine  
151 (DAB substrate buffer and DAB Chromogen, Leica Biosystems) for 5 minutes. Later, samples were  
152 counterstained with Gills haematoxylin (Merck, New Jersey, USA) for 5 minutes, dehydrated in an  
153 ethanol gradient and xylene, and mounted using Entellan mounting medium (Merck).

154 To assess leptin and ObR immunoreactivity were used a scoring system previously reported [6]  
155 [13] [36] and the H-Score published by the American Society of Clinical Oncology (ASCO). The final  
156 IHC score was obtained by multiplying the positive cells (0=absence of staining; 1=all cells stained),  
157 by the highest staining intensity (Table 2), varying from 0 to 3, with tissue samples scored as 0  
158 considered negative, while samples scored as 3 designated highly reactive. All slides were subjected  
159 to blind scoring, by two independent and experienced pathologists.

160 **Table 2.** Scoring criteria of immunostaining assay for leptin and ObR. Three microscopic fields  
161 were analyzed at 400x magnification.

| Stained tumour cells<br>(0-1) | Staining intensity |                |
|-------------------------------|--------------------|----------------|
|                               | Score              | Interpretation |
|                               | 0                  | No staining    |
|                               | 1                  | Weak           |
|                               | 2                  | Moderate       |
|                               | 3                  | Strong*        |

**Final IHC score = stained tumour cells x staining intensity score (0 – 3)**

162 \* High protein reactivity

#### 163 2.4. Statistical analysis

164 Statistical analysis was carried out using the GraphPad Prism software, version 5.04 (California,  
165 USA), with two-tailed p-values less than 0.05 considered statistically significant for a 95% confidence  
166 level (\*p<0.05, \*\*p<0.01 and \*\*\*p<0.001).

167 The non-parametric Kruskal-Wallis test was performed to compare leptin and ObR results  
168 between healthy cats and cats with mammary carcinoma stratified by tumour subtype. Receiver-  
169 operating characteristic (ROC) curves were performed to choose the optimal cut-off value for serum  
170 leptin and ObR levels, and to determine the specificity and sensitivity of the technique to diagnose  
171 the disease. The non-parametric Mann-Whitney test was used to compare the serum levels of both  
172 proteins with several clinicopathological features. Survival analysis was performed using the Kaplan-  
173 Meier test to evaluate the disease-free survival (DFS) in cats with mammary carcinomas. The  
174 correlations between serum ObR levels and serum concentrations of the inflammatory proteins  
175 CTLA-4, TNF- $\alpha$ , PD-1 and PD-L1 were investigated using the Spearman's rank correlation  
176 coefficient.

### 177 3. Results

#### 178 3.1. Cats with mammary carcinoma showed a reduced Free Leptin Index

179 The Free Leptin Index (FLI) was determined in the serum samples of cats with mammary  
180 carcinomas and compared with healthy animals. Results obtained showed that cats with disease had  
181 a significantly lower FLI than control group (0.44 vs. 0.86, p=0.0006, Figure 1).

182 In addition, results revealed that body weight did not influence serum leptin and ObR levels,  
183 both in the controls (p=0.0760 and p=0.8432, respectively, data not shown) and in the cancer group  
184 (p=0.3294 and p=0.9722, respectively, data not shown).

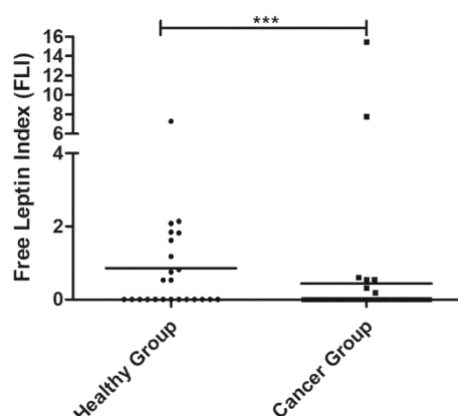

186 **Figure 1.** - Dot plot diagram showing that the free leptin index (FLI) was significantly elevated in  
187 healthy animals that in cats with mammary carcinoma ( $p=0.0006$ ).

188 3.2. Cats with Luminal B or HER2-positive mammary carcinomas showed decreased serum leptin levels

189 Regarding serum leptin levels, results obtained showed that cats with luminal B or HER2-  
190 positive mammary carcinomas had lower serum leptin levels than healthy animals (0.00 pg/mL vs.  
191 13.89 pg/mL,  $p<0.001$ ; 0.83 pg/mL vs. 13.89 pg/mL,  $p<0.05$ , respectively, Figure 2A). The optimal cut-  
192 off value to predict mammary carcinoma was 4.17 pg/ml with an area under the ROC curve (AUC)  
193 of  $0.7045\pm 0.0757$  (95% CI: 0.5561-0.8528,  $p=0.0103$ ; sensitivity=96.9%; specificity=43.5%; Figure 2B).  
194 Further statistical analysis showed that elevated serum leptin levels were associated with tumour  
195 ulceration ( $p=0.0005$ , Figure 2C) and shorter DFS (117 vs. 314 days,  $p=0.0217$ , Figure 2D).

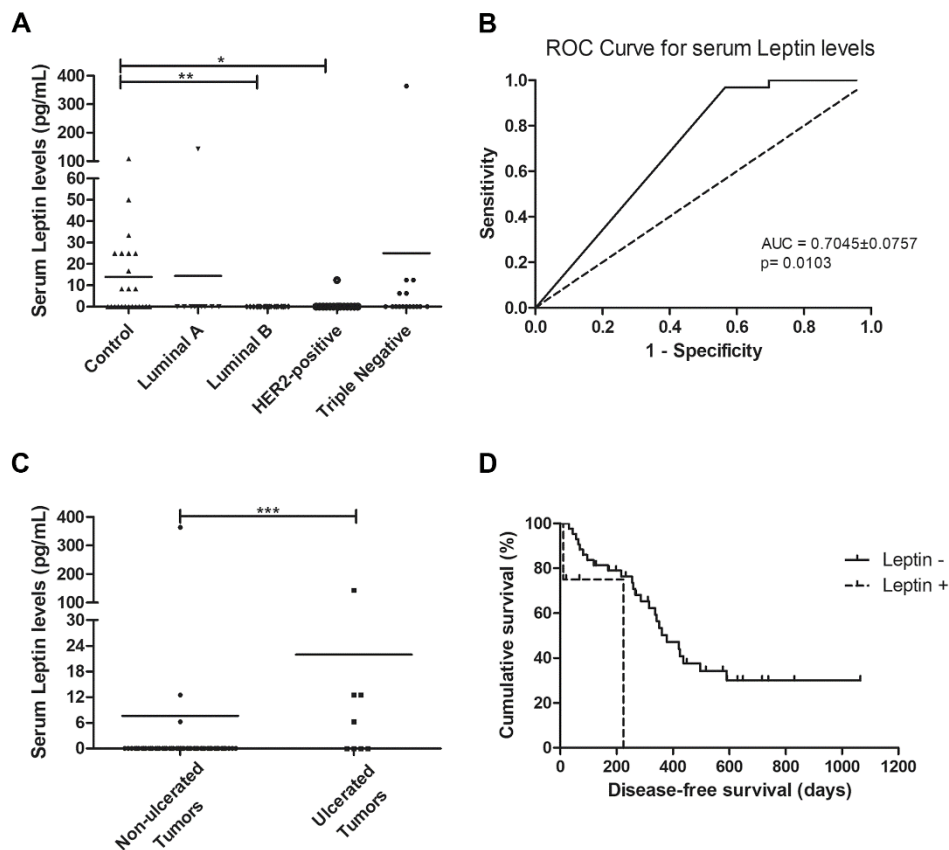

196 **Figure 2.** - Cats with luminal B and HER2-positive mammary carcinomas showed decreased serum leptin  
197 levels, as cats had ulcerated tumours, with serum leptin levels above the cut-off level of 4.17 pg/mL being  
198 associated with shorter disease-free survival. **A)** Dot plot diagram showing the distribution of serum leptin levels  
199 (pg/mL) among healthy animals (control) and cats stratified by mammary carcinoma subtype. Significant  
200 decreased serum levels of leptin were found in cats presenting luminal B or HER2-positive subtypes in  
201 comparison to healthy animals ( $p=0.0025$ ). **B)** The optimal cut-off of serum leptin levels to predict mammary  
202 carcinoma was determined to maximize the sum of the sensitivity and specificity (4.17 pg/mL;  
203  $AUC=0.7045\pm 0.0757$ , 95% CI: 0.5561-0.8528,  $p=0.0103$ ; sensitivity=96.9%; specificity=43.5%). **C)** Dot plot diagram  
204 showing that serum leptin levels were significantly higher in cats with ulcerated tumours ( $p=0.0005$ ). **D)** Cats  
205 with mammary carcinoma and serum leptin levels higher than 4.17 pg/mL had a lower DFS ( $p=0.0217$ ). \* $p<0.05$ ;  
206 \*\* $p<0.001$ ; \*\*\* $p<0.0001$ .

208 3.3. Cats with mammary carcinoma showed elevated serum levels of ObR and of mediators of inflammation

209 Considering the above results, the serum levels of the ObR were also evaluated. When the  
210 animals were grouped according to the tumour subtype, a significant difference was found between  
211 the mean ranks of at least one pair of groups ( $p < 0.0001$ ). Results revealed that serum ObR levels were  
212 significantly higher in animals with mammary carcinoma than in controls, independently of  
213 molecular subtype (control group 15.67 ng/ml; luminal A 23.04 ng/ml,  $p < 0.0001$ ; luminal B 20.18  
214 ng/ml,  $p < 0.001$ ; HER2-positive 28.99 ng/ml,  $p < 0.0001$ ; triple-negative 21.70 ng/ml,  $p < 0.0001$ ; Figure  
215 3A). Furthermore, the optimal cut-off value calculated for cats with mammary carcinoma was 16.89  
216 ng/ml, with an AUC of  $0.9408 \pm 0.0288$  (95% CI: 0.8842-0.9973,  $p < 0.0001$ ; sensitivity=94.8%;  
217 specificity=87.0%; Figure 3B).

218 In addition, elevated serum ObR levels were associated with smaller tumours ( $p = 0.0118$ , Figure  
219 3C) and with cats had HER2-positive mammary tumours showing an ER-negative status ( $p = 0.0291$ ,  
220 Figure 3D).

221

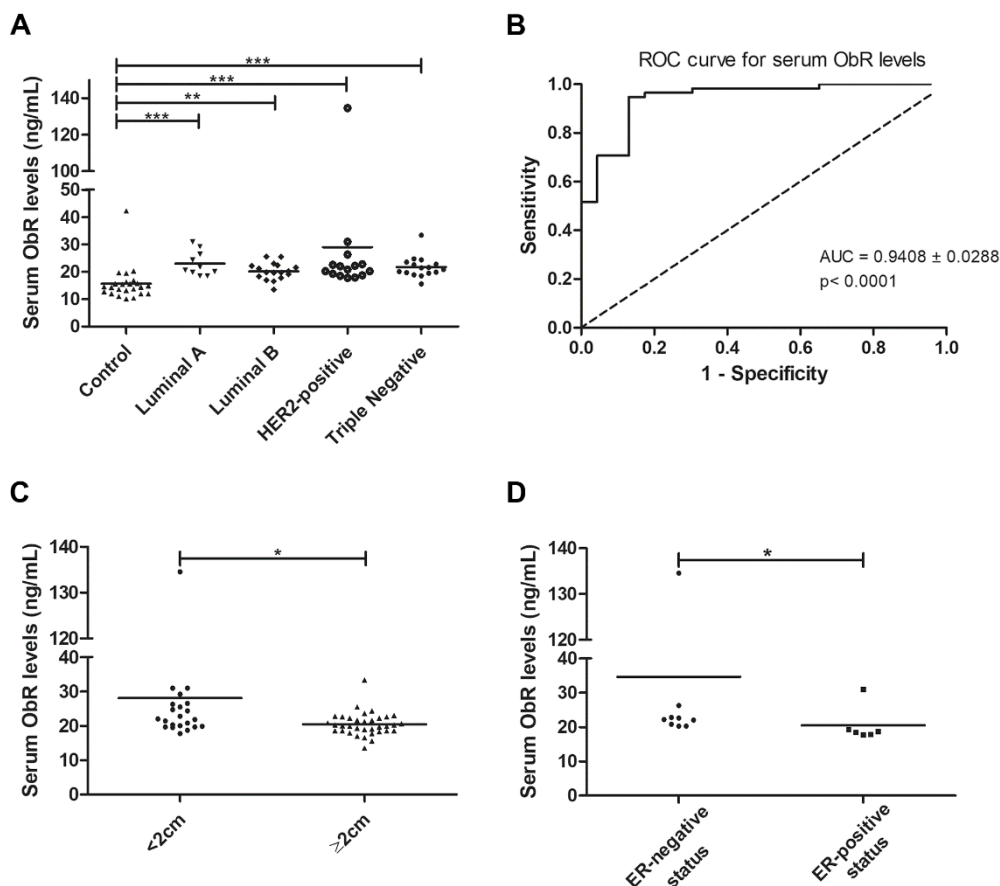

222

223 **Figure 3.** – Cats with mammary carcinoma showed elevated serum ObR levels, with serum  
224 concentrations above 16.89 ng/mL being associated with smaller tumours and with HER-2 positive  
225 mammary carcinomas showing an ER-negative status. **A)** Dot plot diagram showing the distribution  
226 of serum ObR levels (ng/mL) in healthy animals (control) and in cats with mammary carcinoma  
227 stratified by molecular subtype. Significant higher serum levels of ObR were found in all tumour  
228 subtypes in comparison to healthy animals ( $p < 0.0001$ ). **B)** The optimal cut-off value of serum ObR  
229 levels to predict cats with mammary carcinoma was 16.89 ng/mL with an AUC of  $0.9408 \pm 0.0288$  (95%  
230 CI: 0.8842-0.9973,  $p < 0.0001$ ; sensitivity=94.8%; specificity=87.0%). **C)** Dot plot diagram showing that  
231 serum ObR concentrations were significantly low in tumours larger than 2 cm ( $p = 0.0118$ ). **D)** Dot plot

232 diagram for animals with HER2-positive mammary carcinoma displaying a positive association  
233 between higher serum ObR levels and ER-negative status ( $p=0.0291$ ). \* $p<0.05$ ; \*\* $p<0.001$ ; \*\*\* $p<0.0001$ .

234 Moreover, the data obtained also showed a positive correlation between serum ObR  
235 levels and serum CTLA-4 ( $r=0.38$ ,  $p=0.0056$ , Figure 4A), TNF- $\alpha$  ( $r=0.40$ ,  $p=0.0025$ , Figure 4B),  
236 PD-1 ( $r=0.42$ ,  $p=0.0023$ , Figure 4C) and PD-L1 ( $r=0.50$ ,  $p=0.0002$ , Figure 4D) levels.

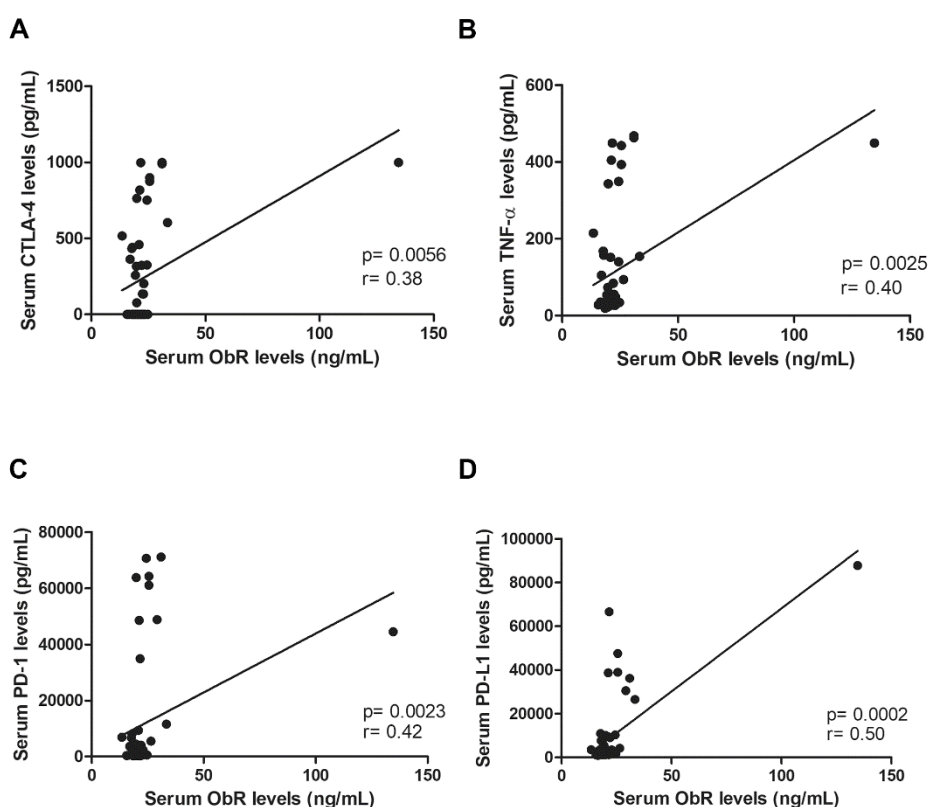

237

238 **Figure 4.** – Serum ObR levels showed a positive correlation between serum ObR levels and A) serum  
239 CTLA-4 levels ( $p=0.0056$ ), B) serum TNF- $\alpha$  levels ( $p=0.0025$ ), C) serum PD-1 levels ( $p=0.0023$ ) and D)  
240 serum PD-L1 levels ( $p=0.0002$ ).

241 *3.4. Leptin and ObR are overexpressed in Luminal B and triple-negative mammary carcinomas*

242 The obtained results revealed that cats with luminal B or triple-negative mammary carcinoma  
243 showed a higher leptin IHC score than controls (1.93 vs. 1.34,  $p<0.05$ ; 2.00 vs. 1.34,  $p<0.05$ ,  
244 respectively; Figures 5A, 6A and 6B). Regarding the leptin receptor, the IHC score was also  
245 significantly higher in animals with a luminal B tumour subtype than healthy animals (2.50 vs. 1.75;  
246  $p=0.0425$ ; Figures 5B, 6C and 6D).



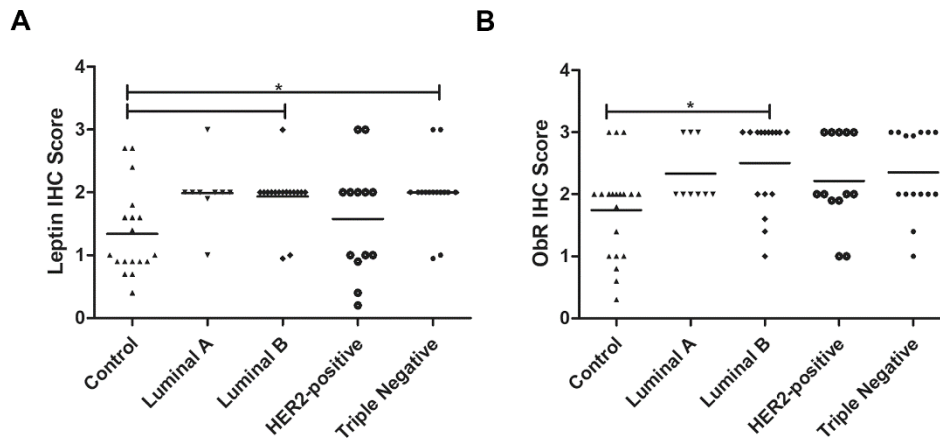

247

248

249

250

251

**Figure 5.** – Final IHC scores for leptin (A) and ObR (B) in cats with mammary carcinoma stratified by tumour subtype and controls. **A)** Leptin expression was significantly higher in luminal B and triple-negative subtypes ( $p=0.0046$ ). **B)** Expression of ObR was statistically higher in luminal B tumour subtype ( $p=0.0425$ ).

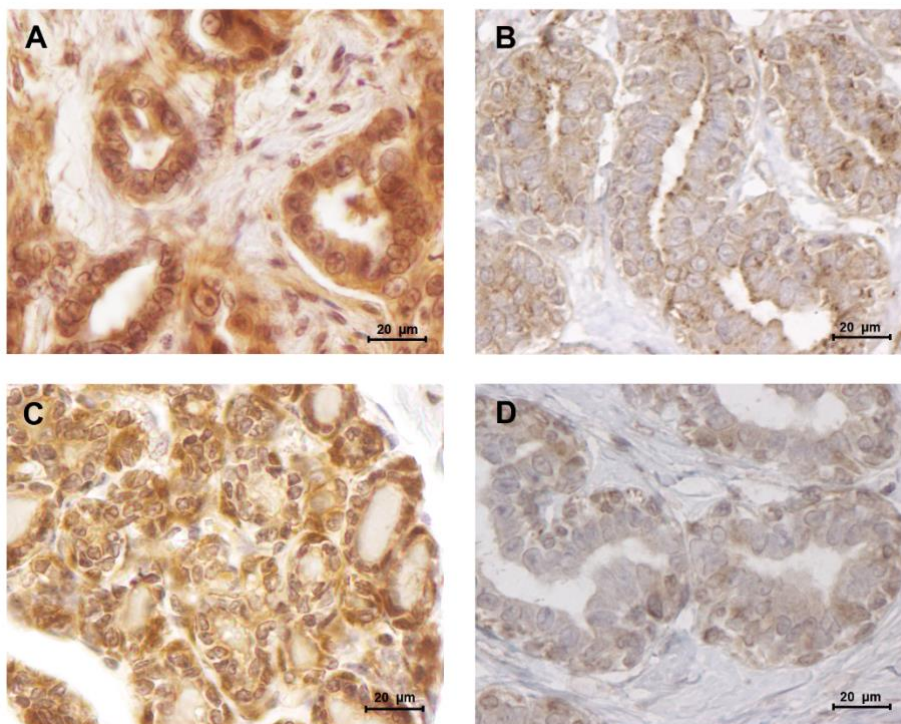

252

253

254

255

256

257

**Figure 6.** – Leptin and ObR are overexpressed in luminal B mammary carcinomas. **A)** Leptin overexpression in a luminal B mammary carcinoma (IHC score of 1.93) contrasting with **B)** a low staining intensity detected in normal mammary tissues (IHC score of 1.34). **C)** Luminal B mammary tumours showed a higher staining intensity for ObR (IHC score of 2.50), **D)** than normal mammary tissues (IHC score of 1.75). (400x magnification)

258

259

260

In addition, our findings revealed that serum ObR levels are negatively correlated with the ObR IHC score, with cats presenting higher serum ObR levels showing mammary tumours with lower ObR IHC scores ( $p=0.0103$ , Figure 7).

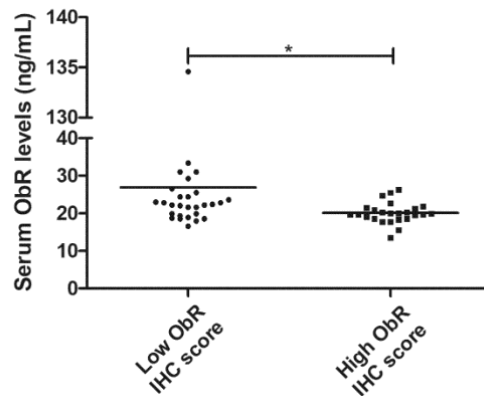

261

262 **Figure 7.** – Dot plot diagram showing a negative correlation between serum ObR levels and tumour  
263 ObR IHC score (p= 0.0103).

264

#### 265 4. Discussion

266 Although spontaneous feline mammary carcinoma has been proposed as a suitable model for  
267 the study of human breast cancer, the role of the leptin/ObR axis has never been exploited in cats  
268 with mammary carcinoma. In humans, previous studies showed that leptin and ObR overexpression  
269 are associated with pro-inflammatory and pro-tumorigenic effects, particularly in overweight  
270 women [7] [5].

271 The results obtained in this study showed that cats with mammary carcinoma have a reduced  
272 Free Leptin Index (FLI) in comparison to healthy animals (p=0.0006), suggesting that diseased  
273 animals may have decreased soluble leptin levels, as reported in pre-menopausal women with breast  
274 cancer [37], and colon cancer patients [38], indicating that serum leptin may be recruited by  
275 mammary cancer cells to promote tumour growth and cell migration [11]. Indeed, cats with luminal  
276 B or HER2-positive mammary carcinoma showed significant lower serum leptin levels when  
277 compared with controls (p<0.001 and p<0.05), revealing that serum leptin levels are downregulated  
278 in tumours with PR-positive status [6] and/or HER2-positive status [14]. In contrast, cats with luminal  
279 A showed elevated serum leptin levels, suggesting that ER overexpression in the tumour may  
280 promote leptin expression [6]. Regarding the elevated serum leptin levels found in cats with triple-  
281 negative mammary carcinomas, studies demonstrated that leptin induces cell proliferative capacity  
282 (e.g. via Wnt/ $\beta$ -catenin pathway) [30] and promotes cell survival by interacting with Bcl-2 proteins,  
283 being associated with more aggressive tumours [39]. Indeed, elevated serum leptin levels were  
284 significantly associated with tumour ulceration (p=0.0005) and shorter DFS (p=0.0217), as reported  
285 for breast cancer patients [6] [7].

286 In parallel, serum ObR levels can also affect the FLI [40], and as reported in breast cancer patients  
287 [6] [41], all cats with mammary carcinoma showed higher serum ObR levels than healthy controls  
288 (p<0.0001), being correlated with smaller tumour size (p=0.0118) and suggesting that ObR shedding  
289 occurs in small tumours, modulating the serum levels of free leptin [15]. Indeed, our results further  
290 support the hypothesis that malignant cells in larger tumours maintain the ObR expression on its  
291 surface to increase their survival and growth [8]. Interestingly, the higher serum ObR levels were  
292 found in cats with mammary carcinomas showing both HER2-positive and ER-negative status

293 (p=0.0291), as reported for human breast cancer patients [6], confirming the crosstalk between the  
294 leptin/ObR axis and the EGFR downstream signalling pathway [42].

295 In addition, this study discloses the utility of leptin and ObR as promising diagnostic biomarkers  
296 for feline mammary carcinoma, with a cut-off value of 4.17 pg/mL determined for serum leptin levels  
297 to predict feline mammary carcinoma (AUC=0.7045±0.0757, sensitivity=96.9%, specificity=43.5%),  
298 whereas a cut-off value of 16.89 ng/mL was calculated for serum ObR levels (AUC=0.9408±0.0288,  
299 sensitivity=94.8%, specificity=87.0%) to differentiate animals with FMC from healthy cats.

300 Interestingly, we also found that serum ObR levels were positively correlated with serum CTLA-  
301 4 (p=0.0056), TNF- $\alpha$  (p=0.0025), PD-1 (p=0.0023) levels as reported in breast cancer [26], and with  
302 serum PD-L1 levels (p=0.0002). Indeed, previous studies showed that activation of the leptin/ObR  
303 axis can result in a chronic inflammatory status [22] [43], a well-known risk factor for breast cancer,  
304 with leptin being involved in CD4+ T-regulatory cells differentiation due to ObR overexpression on  
305 lymphocyte plasm membrane [44]. These activated CD4+ T-regulatory cells express CTLA-4 [22] and  
306 PD-1, two immune-inhibitory checkpoint molecules that downregulate T-cell immune responses [24],  
307 leading to tumoral development [45] and contributing to cell growth [46]. On the other hand, in an  
308 attempt to control the tumorigenesis process, CD4+ T-regulatory cells secrete TNF- $\alpha$  [25], a molecule  
309 that shows a dual role in immunomodulation, being also expressed by cancer cells [47] acting as an  
310 autocrine growth factor [48]. Altogether, these findings provide support to the crosstalk between the  
311 leptin/ObR axis and tumour immunoediting mechanisms, contributing to an immunosuppressive  
312 status in cats with mammary carcinoma [35].

313 The immunostaining analysis of the tumour and normal tissue samples revealed that luminal B  
314 and triple-negative mammary carcinoma subtypes (p<0.05) showed leptin overexpression, whereas  
315 a strong ObR expression was detected in luminal B mammary carcinomas (p=0.0425), as described in  
316 human breast cancer [13], with several studies suggesting that leptin and ObR are overexpressed in  
317 tumoral tissues, due to hypoxia and/or as a response to insulin, IgF-1 and/or to oestradiol [41]. In  
318 addition, the higher IHC scores for leptin found in luminal B carcinomas also support the previously  
319 reported association between the expression of this adipocytokine and aromatase expression, an  
320 enzyme that catalyses the conversion of androgen into oestrogen to promote tumour development  
321 via an ER-dependent mechanism [6]. The overexpression of leptin detected in triple-negative  
322 mammary carcinomas is also in concordance with previous results in triple-negative breast cancer,  
323 where leptin signalling is crucial for tumour growth [16] [39], being associated with ERK and Akt  
324 pathways, both involved in breast cancer cells proliferation [11]. Finally, our results demonstrated  
325 that cats with low ObR-expressing mammary tumours had higher serum ObR levels, indicating a  
326 negative feedback between tumour microenvironment and serum, probably due to a shedding  
327 mechanism that leads to a reduction of serum leptin levels [11] [40]. Furthermore, the data obtained  
328 emphasizes the possibility to block the leptin/leptin receptor axis, as an adjuvant therapy in cats with  
329 luminal B and triple-negative tumour mammary carcinoma subtypes, as reported for breast cancer  
330 patients [29] [32] [31].

331

## 332 5. Conclusion

333 This study evaluated the serum leptin/ObR levels in cats with mammary carcinomas providing  
334 rationale for their use as diagnostic biomarkers and, additionally, the utility of serum leptin levels as  
335 prognostic indicator for the disease-free survival. Indeed, cats with mammary carcinoma showed a

336 significant reduction in the FLI, coupled with decreased serum leptin levels in cats that had luminal  
337 B or triple-negative mammary carcinoma and significant increased serum ObR levels, independently  
338 of the tumour subtype. As discussed, serum leptin levels above the cut-off value of 4.17 pg/mL were  
339 associated to a shorter DFS, whereas serum ObR levels above 16.89 ng/mL were associated to an  
340 immunosuppressive status. In tumour tissue samples, leptin is highly expressed in luminal B and  
341 triple-negative mammary carcinomas, with ObR being overexpressed in luminal B subtype.  
342 Altogether, the data presented extend the knowledge about the similarities between FMC and human  
343 breast cancer, further supporting the utility of spontaneous feline mammary carcinoma as a model  
344 for comparative oncology studies.

345 **Author Contributions:** Conceptualization, A.G. and F.F.; Methodology, A.G. and F.F.; Formal analysis, A.G.,  
346 C.N.; Investigation, A.G., C.N., A.C.U., J.C and F.F.; Supervision, F.F.; Funding acquisition, F.F.; Project  
347 administration, F.F.; Writing – original draft preparation, A.G. and F.F.; Writing – review and editing, A.G., C.N.,  
348 A.C.U., J.C., and F.F. All authors have read and agreed to the published version of the manuscript.

349 **Funding:** This research was funded by Fundação para a Ciência e a Tecnologia (Portugal) through the projects  
350 PTDC/CVT-EPI/3638/2014 and CIISA-UID/CVT/00276/2020. A.G. is receipt of a PhD fellowship from Fundação  
351 para a Ciência e a Tecnologia (ref. SFRH/BD/132260/2017) and C.N. is receipt of a PhD fellowship from  
352 University of Lisbon (ref.C00191r).

353 **Acknowledgments:** The authors would like to thank Dra. Maria Soares for the clinical samples and database.

354 **Conflicts of Interest:** The authors declare no conflict of interest. The funders had no role in the design of the  
355 study; in the collection, analyses, or interpretation of data; in the writing of the manuscript, or in the decision to  
356 publish the results.

357

## 358 References

- 359 1. Soares, M.; Ribeiro, R.; Najmudin, S.; Gameiro, A.; Rodrigues, R.; Cardoso, F.; Ferreira, F. Serum HER2  
360 levels are increased in cats with mammary carcinomas and predict tissue HER2 status. *Oncotarget* **2016**,  
361 *7*, 17314–17326. doi: 10.18632/oncotarget.7551.
- 362 2. Porrello, A.; Cardelli, P.; Spugnini, E.P. Oncology of companion animals as a model for humans. An  
363 overview of tumor histotypes. *J. Exp. Clin. Cancer Res.* **2006**, *25*, 97–105.
- 364 3. Vail, D.M.; Macewen, E.G. Spontaneously Occurring Tumors of Companion Animals as Models for  
365 Human Cancer. *Cancer Invest.* **2000**, *18*, 781–792. doi: 10.3109/07357900009012210.
- 366 4. Shibata, H.; Sasaki, N.; Honjoh, T.; Ohishi, I.; Takiguchi, M.; Ishioka, K.; Ahmed, M.; Soliman, M.;  
367 Kimura, K.; Saito, M. Feline Leptin: Immunogenic and Biological Activities of the Recombinant Protein,  
368 and Its Measurement by ELISA. *J. Vet. Med. Sci.* **2003**, *65*, 1207–1211. doi: 10.1292/jvms.65.1207.
- 369 5. Pan, H.; Deng, L.-L.; Cui, J.-Q.; Shi, L.; Yang, Y.-C.; Luo, J.-H.; Qin, D.; Wang, L. Association between  
370 serum leptin levels and breast cancer risk: An updated systematic review and meta-analysis. *Medicine*  
371 *(Baltimore)*. **2018**, *97*, e11345. doi: 10.1097/MD.0000000000011345.
- 372 6. Hosney, M.; Sabet, S.; Shinawi, M.E.L. Leptin is overexpressed in the tumor microenvironment of obese  
373 patients with estrogen receptor positive breast cancer. *Exp. Ther. Med.* **2017**, *13*, 2235–2246. doi:  
374 10.3892/etm.2017.4291.
- 375 7. Modzelewska, P.; Chludzińska, S.; Lewko, J.; Reszeć, J. The influence of leptin on the process of  
376 carcinogenesis. *Współczesna Onkol.* **2019**, *23*, 63–68. doi: 10.5114/wo.2019.85877.
- 377 8. Artac, M.; Altundag, K. Leptin and breast cancer: an overview. *Med. Oncol.* **2012**, *29*, 1510–1514. doi:  
378 10.1007/s12032-011-0056-0.
- 379 9. Bonofiglio, D.; Barone, I.; Catalano, S. Obesity, Leptin and Breast Cancer: Epidemiological Evidence and  
380 Proposed Mechanisms. *Cancers (Basel)*. **2019**, *11*, 1–27. doi: 10.3390/cancers11010062.
- 381 10. Kang, Y.J.; Moon, A. Roles of leptin in cancer progression. *Biomol. Ther.* **2010**, *18*, 363–374. doi:

- 382 10.4062/biomolther.2010.18.4.363.
- 383 11. Kim, H.S. Leptin and Leptin Receptor Expression in Breast Cancer. *Cancer Res. Treat.* **2009**, *41*, 155. doi:  
384 10.4143/crt.2009.41.3.155.
- 385 12. Artwohl, M.; Roden, M.; Hölzenbein, T.; Freudenthaler, A.; Waldhäusl, W.; Baumgartner-Parzer, S.M.  
386 Modulation by leptin of proliferation and apoptosis in vascular endothelial cells. *Int. J. Obes.* **2002**, *26*,  
387 577–580. doi: 10.1038/sj.ijo.0801947.
- 388 13. Khabaz, M.N.; Abdelrahman, A.; Butt, N.; Damnhory, L.; Elshal, M.; Aldahlawi, A.M.; Ashoor, S.; Al-  
389 maghrabi, B.; Dobson, P.; Brown, B.; et al. Immunohistochemical staining of leptin is associated with  
390 grade, stage, lymph node involvement, recurrence, and hormone receptor phenotypes in breast cancer.  
391 *BMC Womens. Health* **2017**, *17*, 1–8. doi: 10.1186/s12905-017-0459-y.
- 392 14. Cha, Y.; Kang, Y.; Moon, A. HER2 induces expression of leptin in human breast epithelial cells. *BMB*  
393 *Rep.* **2012**, *45*, 719–723. doi: 10.5483/BMBRep.2012.45.12.164.
- 394 15. E. Gorska, K. Popko, A. Stelmaszczyk-Emmel, O. Ciepiela, A. Kucharska, M.W. Leptin Receptors. *Eur.*  
395 *J. Med. Res.* **2010**, *209*, 50–54. doi: 10.1007/978-3-642-24716-3\_1.
- 396 16. Sánchez-Jiménez, F.; Pérez-Pérez, A.; de la Cruz-Merino, L.; Sánchez-Margalet, V. Obesity and Breast  
397 Cancer: Role of Leptin. *Front. Oncol.* **2019**, *9*, 1–12. doi: 10.3389/fonc.2019.00596.
- 398 17. Appelton, D.J.; Rand, J.S.; Sunvold, G.D. Plasma leptin concentrations in cats: reference range, effect of  
399 weight gain and relationship with. *J. Feline Med. Surg.* **2000**, *2*, 191–199. doi: 10.1053/jfms.2000.0103.
- 400 18. Najiba Lahlou, Karine Clement, Jean-Claude Carel, C.V. et al Soluble leptin receptor in serum of subjects  
401 with complete resistance to leptin: Relation to fat mass. *Diabetes* **2000**, *49*, 1347–1352. doi:  
402 10.2337/diabetes.49.8.1347.
- 403 19. Owecki, M.; Nikisch, E.; Miczke, A.; Pupek-Musialik, D.; Sowiński, J. Free leptin index as a marker for  
404 leptin action in diabetes and obesity: Leptin and soluble leptin receptors relationship with HbA1c.  
405 *Neuroendocrinol. Lett.* **2010**, *31*, 679–684.
- 406 20. Rodrigo, C.; Tennekoon, K.H.; Karunanayake, E.H.; De Silva, K.; Amarasinghe, I.; Wijayasiri, A.  
407 Circulating leptin, soluble leptin receptor, free leptin index, visfatin and selected leptin and leptin  
408 receptor gene polymorphisms in sporadic breast cancer. *Endocr. J.* **2017**, *64*, 393–401. doi:  
409 10.1507/endocrj.EJ16-0448.
- 410 21. Zhang, Y.; Wilsey, J.T.; Frase, C.D.; Matheny, M.M.; Bender, B.S.; Zolotukhin, S.; Scarpace, P.J. Peripheral  
411 but not central leptin prevents the immunosuppression associated with hypoleptinemia in rats. *J.*  
412 *Endocrinol.* **2002**, *174*, 455–461. doi: 10.1677/joe.0.1740455.
- 413 22. Wei, R.; Hu, Y.; Dong, F.; Xu, X.; Hu, A.; Gao, G. Hepatoma cell-derived leptin downregulates the  
414 immunosuppressive function of regulatory T-cells to enhance the anti-tumor activity of CD8 + T-cells.  
415 *Immunol. Cell Biol.* **2016**, *94*, 388–399. doi: 10.1038/icb.2015.110.
- 416 23. Dayakar, A.; Chandrasekaran, S.; Veronica, J.; Bharadwaja, V.; Maurya, R. Leptin regulates Granzyme-  
417 A, PD-1 and CTLA-4 expression in T cell to control visceral leishmaniasis in BALB/c Mice. *Sci. Rep.* **2017**,  
418 *7*, 1–12. doi: 10.1038/s41598-017-15288-7
- 419 24. Erfani, N.; Razmkhah, M.; Ghaderi, A. Circulating soluble CTLA4 (sCTLA4) is elevated in patients with  
420 breast cancer. *Cancer Invest.* **2010**, *28*, 828–832. doi: 10.3109/07357901003630934.
- 421 25. Singh, S.; Mayengbam, S.S.; Chouhan, S.; Deshmukh, B.; Ramteke, P.; Athavale, D.; Bhat, M.K. Role of  
422 TNF $\alpha$  and leptin signaling in colon cancer incidence and tumor growth under obese phenotype. *Biochim.*  
423 *Biophys. Acta - Mol. Basis Dis.* **2020**, *1866*, 165660. doi: 10.1016/j.bbdis.2019.165660.
- 424 26. Rivadeneira, D.B.; DePeaux, K.; Wang, Y.; Kulkarni, A.; Tabib, T.; Menk, A. V.; Sampath, P.; Lafyatis, R.;

- 425 Ferris, R.L.; Sarkar, S.N.; et al. Oncolytic Viruses Engineered to Enforce Leptin Expression Reprogram  
426 Tumor-Infiltrating T Cell Metabolism and Promote Tumor Clearance. *Immunity* **2019**, *51*, 548-560.e4. doi:  
427 10.1016/j.immuni.2019.07.003.
- 428 27. El Andaloussi, A.; Al-Hendy, A. Regulation of PD-1 and leptin receptor expression by estrogen through  
429 AKT3 in human uterine fibroids. *Fertil. Steril.* **2017**, *108*, e65. doi: 10.1016/j.fertnstert.2017.07.205.
- 430 28. Wang, Z.; Aguilar, E.G.; Luna, J.I.; Dunai, C.; Khuat, L.T.; Le, C.T.; Mirsoian, A.; Minnar, C.M.; Stoffel,  
431 K.M.; Sturgill, I.R.; et al. Paradoxical effects of obesity on T cell function during tumor progression and  
432 PD-1 checkpoint blockade. *Nat. Med.* **2019**, *25*, 141–151. doi: 10.1038/s41591-018-0221-5.
- 433 29. Surmacz, E. Leptin and adiponectin: Emerging therapeutic targets in breast cancer. *J. Mammary Gland*  
434 *Biol. Neoplasia* **2013**, *18*, 321–332. doi: 10.1007/s10911-013-9302-8.
- 435 30. Linares, R.L.; Benítez, J.G.S.; Reynoso, M.O.; Romero, C.G.; Sandoval-Cabrera, A. Modulation of the  
436 leptin receptors expression in breast cancer cell lines exposed to leptin and tamoxifen. *Sci. Rep.* **2019**, *9*,  
437 1–9. doi: 10.1038/s41598-019-55674-x.
- 438 31. Guo, S.; Liu, M.; Wang, G.; Torroella-Kouri, M.; Gonzalez-Perez, R.R. Oncogenic role and therapeutic  
439 target of leptin signaling in breast cancer and cancer stem cells. *Biochim. Biophys. Acta - Rev. Cancer* **2012**,  
440 *1825*, 207–222. doi: 10.1016/j.bbcan.2012.01.002.
- 441 32. Otvos, L.; Kovalszky, I.; Riolfi, M.; Ferla, R.; Olah, J.; Sztodola, A.; Nama, K.; Molino, A.; Piubello, Q.;  
442 Wade, J.D.; et al. Efficacy of a leptin receptor antagonist peptide in a mouse model of triple-negative  
443 breast cancer. *Eur. J. Cancer* **2011**, *47*, 1578–1584. doi: 10.1016/j.ejca.2011.01.018.
- 444 33. Lippi, G.; Avanzini, P.; Zobbi, V.; Ippolito, L. Influence of mechanical hemolysis of blood on two D-  
445 dimer immunoassays. *Blood Coagul. Fibrinolysis* **2012**, *23*, 461–463. doi: 10.1097/MBC.0b013e3283549696.
- 446 34. Soares, M.; Madeira, S.; Correia, J.; Peleteiro, M.; Cardoso, F.; Ferreira, F. Molecular based subtyping of  
447 feline mammary carcinomas and clinicopathological characterization. *Breast* **2016**, *27*, 44–51. doi:  
448 10.1016/j.breast.2016.02.016.
- 449 35. Urbano, A.C.; Nascimento, C.; Soares, M.; Correia, J.; Ferreira, F. Clinical Relevance of the serum CTLA-  
450 4 in Cats with Mammary Carcinoma. *Sci. Rep.* **2020**, *10*, 3822. doi: 10.1038/s41598-020-60860-3.
- 451 36. Ishikawa, M.; Kitayama, J.; Nagawa, H. Enhanced expression of leptin and leptin receptor (OB-R) in  
452 human breast cancer. *Clin. Cancer Res.* **2004**, *10*, 4325–4331. doi: 10.1158/1078-0432.CCR-03-0749.
- 453 37. Georgiou, G.P.; Provatopoulou, X.; Kalogera, E.; Siasos, G.; Menenakos, E.; Zografos, G.C.; Gounaris, A.  
454 Serum resistin is inversely related to breast cancer risk in premenopausal women. *Breast* **2016**, *29*, 163–  
455 169. doi: 10.1016/j.breast.2016.07.025.
- 456 38. Arpaci, F.; Yilmaz, M.I.; Ozet, A.; Ayta, H.; Ozturk, B.; Komurcu, S.; Ozata, M. Low serum leptin level  
457 in colon cancer patients without significant weight loss. *Tumori* **2002**, *88*, 147–149. doi:  
458 10.1177/030089160208800213.
- 459 39. Crean-Tate, K.K.; Reizes, O. Leptin regulation of cancer stem cells in breast and gynecologic cancer.  
460 *Endocrinology* **2018**, *159*, 3069–3080. doi: 10.1210/en.2018-00379.
- 461 40. Chan, J.L.; Blüher, S.; Yiannakouris, N.; Suchard, M.A.; Kratzsch, J.; Mantzoros, C.S. Regulation of  
462 circulating soluble leptin receptor levels by gender, adiposity, sex steroids, and leptin observational and  
463 interventional studies in humans. *Diabetes* **2002**, *51*, 2105–2112. doi: 10.2337/diabetes.51.7.2105.
- 464 41. Garofalo, C.; Koda, M.; Cascio, S.; Sulkowska, M.; Kanczuga-Koda, L.; Golaszewska, J.; Russo, A.;  
465 Sulkowski, S.; Surmacz, E. Increased expression of leptin and the leptin receptor as a marker of breast  
466 cancer progression: Possible role of obesity-related stimuli. *Clin. Cancer Res.* **2006**, *12*, 1447–1453. doi:  
467 10.1158/1078-0432.CCR-05-1913.

- 468 42. Wauman, J.; Zabeau, L.; Tavernier, J. The leptin receptor complex: Heavier than expected? *Front.*  
469 *Endocrinol. (Lausanne)*. **2017**, *8*, 1–20. doi: 10.3389/fendo.2017.00030.
- 470 43. Paz-Filho, G.; Mastronardi, C.; Franco, C.B.; Wang, K.B.; Wong, M.-L.; Licinio, J. Leptin: molecular  
471 mechanisms, systemic pro-inflammatory effects, and clinical implications. *Arq. Bras. Endocrinol. Metabol.*  
472 **2012**, *56*, 597–607. doi: 10.1590/s0004-27302012000900001.
- 473 44. Kim, S.Y.; Lim, J.H.; Choi, S.W.; Kim, M.; Kim, S.T.; Kim, M.S.; Cho, Y.S.; Chun, E.; Lee, K.Y. Preferential  
474 effects of leptin on CD4 T cells in central and peripheral immune system are critically linked to the  
475 expression of leptin receptor. *Biochem. Biophys. Res. Commun.* **2010**, *394*, 562–568. doi:  
476 10.1016/j.bbrc.2010.03.019.
- 477 45. Chen, M.I. and L. Role of B7-H1 and B7-H4 Molecules in Down-Regulation Effector Phase of T-Cell  
478 Immunity: Novel Cancer Escaping Mechanisms. *Front. Biosci.* **2005**, *10*, 2856–2860. doi: 10.2741/1742.
- 479 46. Wang, X.; Teng, F.; Kong, L.; Yu, J. PD-L1 expression in human cancers and its association with clinical  
480 outcomes. *Onco. Targets. Ther.* **2016**, *9*, 5023–5039. doi: 10.2147/OTT.S105862.
- 481 47. Montesano, R.; Soulié, P.; Eble, J.A.; Carrozzino, F. Tumour necrosis factor  $\alpha$  confers an invasive,  
482 transformed phenotype on mammary epithelial cells. *J. Cell Sci.* **2005**, *118*, 3487–3500. doi:  
483 10.1242/jcs.02467.
- 484 48. Gautam Sethi, Bokyung Sung, B.B.A. TNF: A master switch for inflammation to cancer. *Front. Biosci.*  
485 **2008**, 5094–5107. doi: 10.2741/3066.
- 486

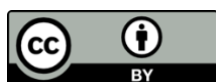

© 2020 by the authors. Submitted for possible open access publication under the terms and conditions of the Creative Commons Attribution (CC BY) license (<http://creativecommons.org/licenses/by/4.0/>).
